# Supplementary material for: The bi-functional roles of Ca-Y zeolite in the treatment of ethanol–HCl induced gastric ulcer using a mice model
Source: Royal Society of Chemistry journal article supplement (doi:10.1039/c5ra24467f), 2015-12-18
Supplement: c5ra24467f1.pdf [file c5ra24467f1.pdf]

## Supplementary Information

### Bi-functional Roles of Ca-Y Zeolite in Treatment of Ethanol-HCl Induced Gastric Ulcer in a Mice Model

Xiaoqiang Shang,<sup>a</sup> Hao Chen,<sup>a</sup> Yingliang Qu<sup>b,c</sup> and Jie Fan.\*<sup>a</sup>

<sup>a</sup> Key Lab of Applied Chemistry of Zhejiang Province, Zhejiang University, Hangzhou 310027, China.

<sup>b</sup> Zhejiang University Institute of Technology Innovation, Hangzhou 310030, China

<sup>c</sup> Zeo-Innov Medical Technology Inc., Hangzhou 310027, China

\* E-mail: [jfan@zju.edu.cn](mailto:jfan@zju.edu.cn)

#### 1. Materials

The following chemicals and drugs are used: ethanol, hydrogen chloride, formaldehyde aqueous solution (37% w.t), pepsin (Aladdin, JINCHUN biochemical tech. Co. Ltd, Shanghai, China), Omeprazole Capsule (CONBA Bio-pharm. Co. Ltd., Jinhua, China), and Bovine thrombin (Sigma-Aldrich Trading Co Ltd, Shanghai, China), thrombin Chromogenic substrate (BIOPHEN CS-01(38), HYPHEN BioMed), porcine plasma (YuHang District Slaughter House, Hang Zhou, China).

#### 2. Ca-Y preparation by ion exchange<sup>1</sup>

The ion-exchange process was carried by mixing synthesized sodium Y zeolite with metal chloride solution. In a typical ion-exchange process, 1.0 g of zeolite was added into 10 mL of 5 M CaCl<sub>2</sub> at 25 ± 0.1 °C. After 3 h stirring, the zeolite powder was filtered and dried. The process was repeated by twice.

#### 3. Elementary analysis

Elementary analysis were conducted by X-Ray Fluorescence spectrometer. (ARL ADVANT'X IntelliPower™ 4200, ThermoFisher, U.S.A) Those elements concentration under 0.5% w.t were ignored.

Table. S1 Molecular formula and Si/Al ratio of Na-Y and Ca-Y zeolite.

| Zeolite | Molecular formula                                                                                                                         | Si/Al |
|---------|-------------------------------------------------------------------------------------------------------------------------------------------|-------|
| Na-Y    | Na <sub>0.55</sub> (SiO <sub>2</sub> ) <sub>1.03</sub> (AlO <sub>2</sub> ) <sub>0.40</sub> • $\gamma$ H <sub>2</sub> O                    | 2.56  |
| Ca-Y    | Ca <sub>0.17</sub> Na <sub>0.12</sub> (SiO <sub>2</sub> ) <sub>1.08</sub> (AlO <sub>2</sub> ) <sub>0.42</sub> • $\gamma$ H <sub>2</sub> O | 2.57  |

After calcium(II) ion exchange process, the ion exchange degree (IED) was calculated as:

$$\text{IED} = \frac{n_{\text{Ca}} \cdot Z_{\text{Ca}}}{n_{\text{Ca}} \cdot Z_{\text{Ca}} + n_{\text{Na}} \cdot Z_{\text{Na}}} = \frac{0.17 \cdot 2}{0.17 \cdot 2 + 0.12 \cdot 1} = 74\%$$

#### 4. Ca-Y/HPC composite preparation

In a typical assay, 100 mg Ca-Y was mixed with 100  $\mu$ L deionized water plus 100  $\mu$ L porcine plasma for 10 minutes. Such made fresh Ca-Y/HPC composite can be used immediately or further dried under vacuum at 28 °C, and stored in a vacuum drier at room temperature.

#### 5. X-ray powder diffraction (XRD)

X-ray powder diffraction patterns were collected on Ultima IV (Rigaku, JP) instrument using

monochromatic Cu K $\alpha$  radiation. Patterns from 10 - 80 degree were collected with a scanning speed at 10 degree per minute. Data were analyzed using Jade 6.5 software.

**6. Scanning electron microscope (SEM) analysis conducted by SU 8010 (Hitachi, Japan)**

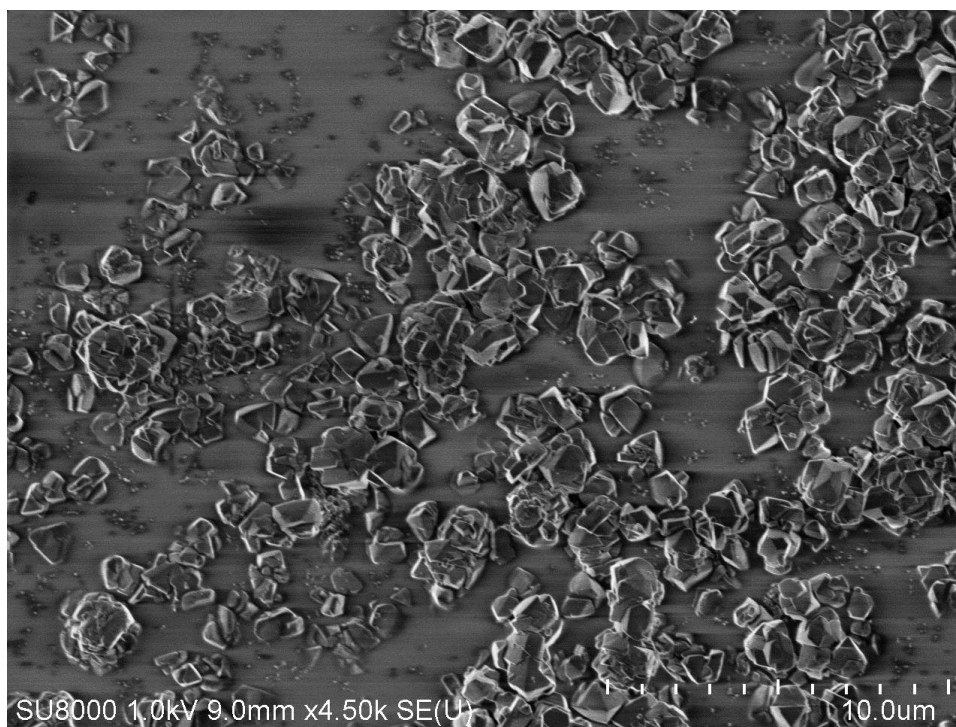

Fig. S1 SEM of Na-Y.

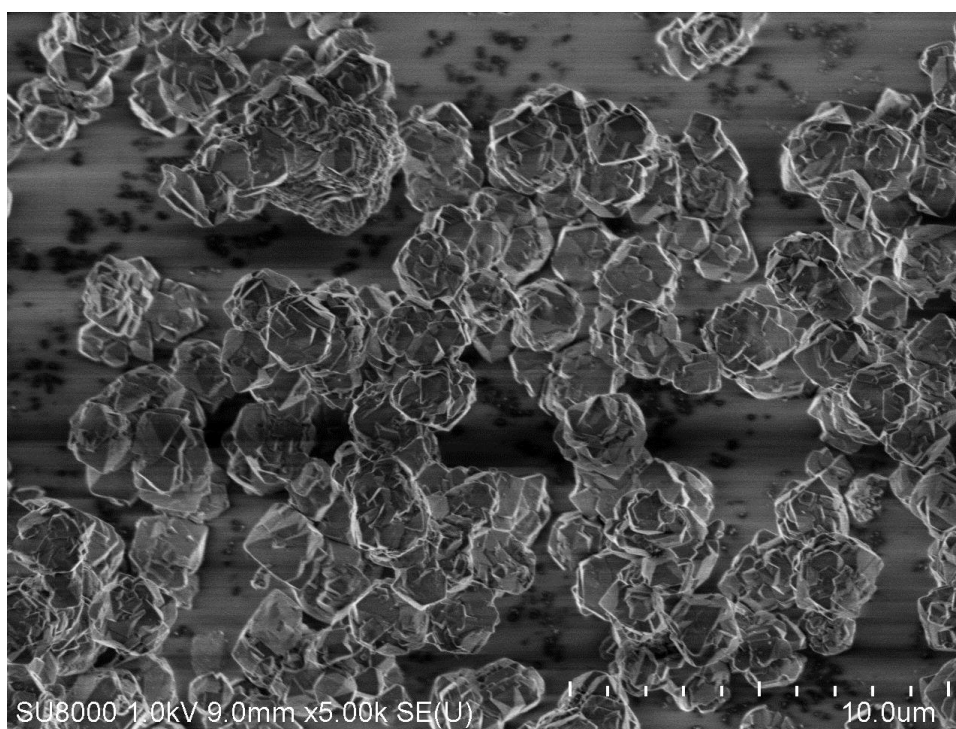

Fig. S2 SEM of Ca-Y.

The mean particle size of Ca-Y is  $2.48 \pm 0.93 \mu\text{m}$ , calculated by Digital Micrograph Software.

## 7. Procoagulant activity by *in vitro* clotting assay<sup>1</sup>

An *in vitro* clotting assay was used to measure the procoagulant activity of hemostatic agents after treatment with artificial gastric juice (1% w.t pepsin in pH 2.5 HCl solution, according to the Pharmacopoeia of the P.R.C) or deionized water separately. The assay measured the coagulant response in terms of a clotting time (CT), defined as the time required from activation of the intrinsic pathway of coagulation cascade to the appearance of a firm clot which stuck to the wall of a polystyrene tube. Hemostatic used are zeolite or zeolite with hard protein corona (zeolite/HPC) which was made by mixing zeolite with plasma, like mix 100 mg zeolite, 100  $\mu$ L water and 100  $\mu$ L normal plasma for 10 minutes. In a typical assay, 100 mg hemostatic agents were presented in a 5 mL polystyrene tube (52 mm  $\times$  12 mm), mixed with 0.5 mL artificial gastric juice or water for 5 mins, and then 2 mL citrated porcine plasma with 60  $\mu$ L of 0.2 M CaCl<sub>2</sub> were injected meanwhile started timing. The capped tubes were rotated at 30 rpm on a mute mixer and the corresponding CT was recorded. The re-calcium ionization was always applied using 60  $\mu$ L of 0.2 M CaCl<sub>2</sub>, and 0.2 mL thrombin solution (100 NIH U/mL) were used to make a comparison. The clotting assays were carried at 25 °C.

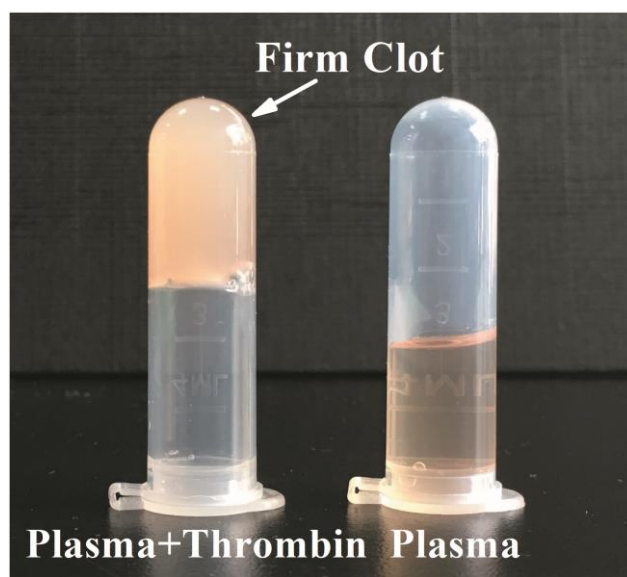

Fig. S3 Optical image of plasma with/without addition of thrombin solution (20 NIH U) under normal conditions. After addition of thrombin molecules, the plasma forms a firm clot sticks to tube within seconds.

## 8. Thrombin chromogenic substrate assays.

In a typical assay, 100 mg of Ca-Y/HPC or 0.2 mL thrombin (100 NIH U/mL) solution was mixed with 0.5 mL of artificial gastric juice or deionized water for 5 minutes. Then the suspension was added with 0.2 mL of 0.2 M Tris-HCl (pH 7.4) buffer and 0.1 mL of thrombin Chromogenic substrate solution (4 mg/mL, HYPHEN BioMed). After 2 min in water bath of 37 °C, the thrombin in the suspension was quickly deactivated by adding 100  $\mu$ L of 1.0 M Pb(NO<sub>3</sub>)<sub>2</sub> solution. The supernatant solution was removed by centrifugation (14000 rpm, 4 min) and the absorbance was determined at 405 nm by UV-Vis.

## 9. Experiment *in vivo*

### Animals

Five-week-old male ICR mice weighing 20  $\pm$  2g were used in this study, which are obtained from

Laboratory Animal Center of Zhejiang province, China. The mice are housed at 25 °C under a 12 hr light-dark cycle and have free access to food and water. All mice are randomly divided in six groups, each group contains 6-8 mice. All procedures relating to animal care and treatment conformed to the animal welfare guidelines of the laboratory animal center of Zhejiang University.

### Ethanol-HCl induced gastric ulcer

Animals were fasted for 24 hours before the experiments, but allowed free access to water. Gastric ulcer lesions were induced by intragastric administration (0.1 mL/10g) of ethanol-HCl mixed solution (200 mM HCl in 50% ethanol).<sup>2</sup> Half hour before HCl/ethanol application, 0.2 mL solution of the zeolite (50 mg/mL, 250 mg/mL, 500 mg/mL), thrombin (250 NIH U/mL), and Omeprazole (450 µg/mL) were intragastric administrated. One hour after ethanol-HCl administration, the animals were killed by cervical dislocation, stomachs were quickly removed, measuring the acidity of remaining gastric juice, and then inflated with 2 mL of 4% formaldehyde for 1hour. After fixation, the stomachs were opened along the great curvature, irrigated with 4% formaldehyde, and then stretched out to capture images using D3100, Nikon.

Table S2. *In vivo* experiment of gastric ulcer model in mice

| Group                    | Ulcer area percentage<br>(Mean ± SEM)% | Intragastric pH |
|--------------------------|----------------------------------------|-----------------|
| Control                  | 35.1 ± 4.4                             | 2.0 ± 0.5       |
| Thrombin (2500 NIH U/kg) | 32.9 ± 3.3                             | 2.0 ± 0.5       |
| Omeprazole (4.5 mg/kg)   | 19.8 ± 1.7                             | 4.5 ± 0.5       |
| Ca-Y (0.5 g/kg)          | 23.3 ± 2.2                             | 2.2 ± 0.5       |
| Ca-Y (2.5 g/kg)          | 17.8 ± 2.0                             | 3.5 ± 0.5       |
| Ca-Y (5.0 g/kg)          | 11.5 ± 1.9                             | 4.5 ± 0.5       |

### Statistical analysis

The images are analyzed by Image J software to measure the ulcer area. And the ulcer percentage (the ulcer area/entirety area) were used to indicate the degree of lesion. Data are presented as the means ± standard error of the mean (SEM). Statistical comparisons were made with Student's t-test or one-way analysis of variance (ANOVA), with  $p < 0.05$  being considered to indicate a statistical significance.

### References:

1. Y. Li, X. Liao, X. Zhang, G. Ma, S. Zuo, L. Xiao, G. D. Stucky, Z. Wang, X. Chen, X. Shang and J. Fan, *NANO RES*, 2014, **7**, 1457-1465.
2. A. Oyagi, K. Ogawa, M. Kakino and H. Hara, *BMC Complement Altern Med*, 2010, **10**, 45.
